# Supplementary material for: Characterization of cell-cell communication in autistic brains with single-cell transcriptomes
Source: PubMed Central journal article supplement (PMC9059394; doi:10.1186/s11689-022-09441-1), 2022-05-02
Supplement: 11689_2022_9441_MOESM3_ESM.pdf [file 11689_2022_9441_MOESM3_ESM.pdf]

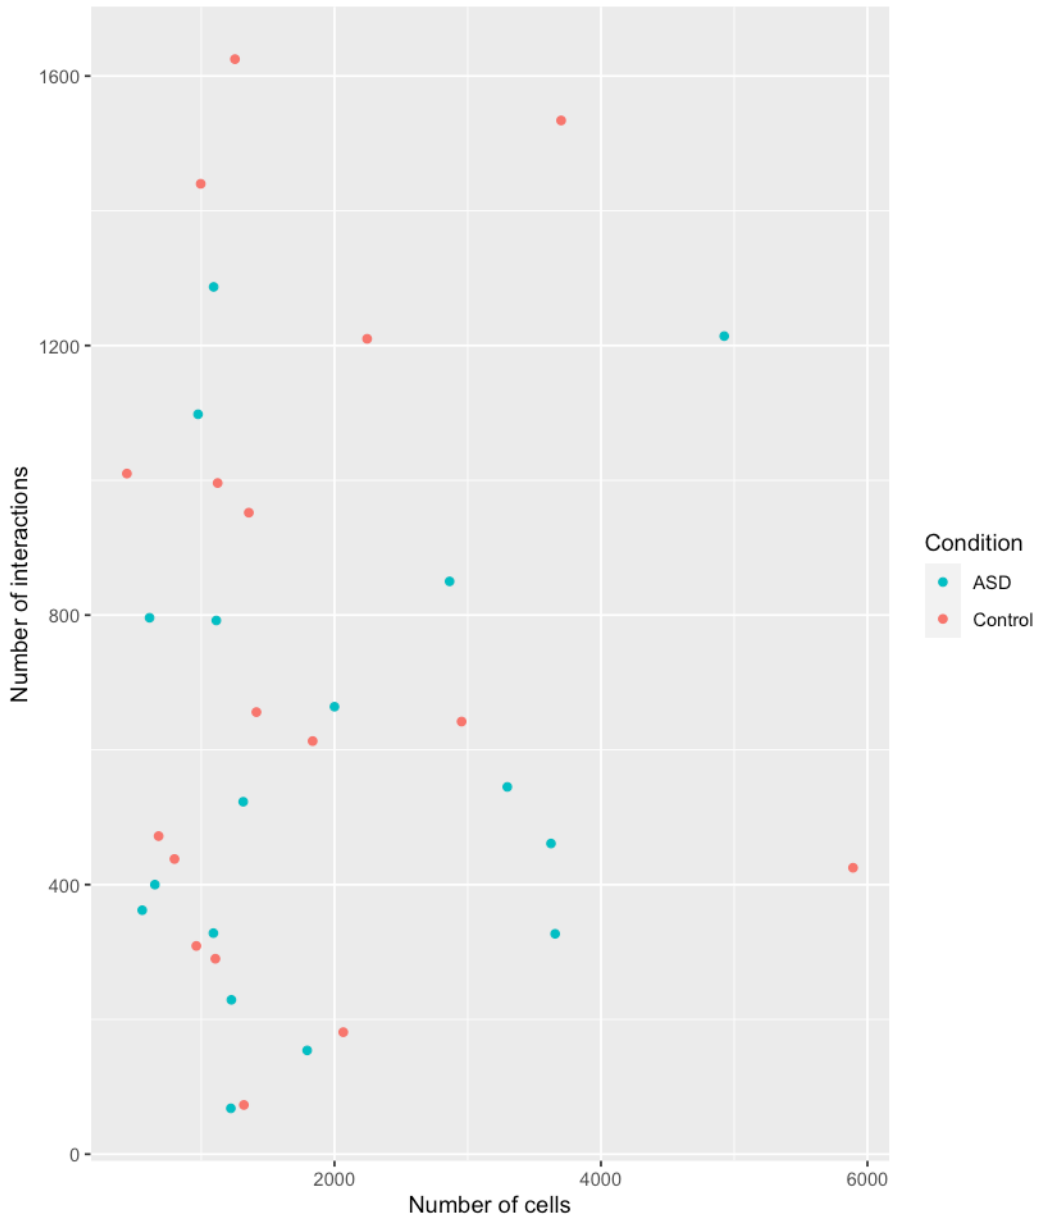

**Figure S1. Scatter plot for cell numbers in the 17 cell types and their numbers of CCC interactions.**

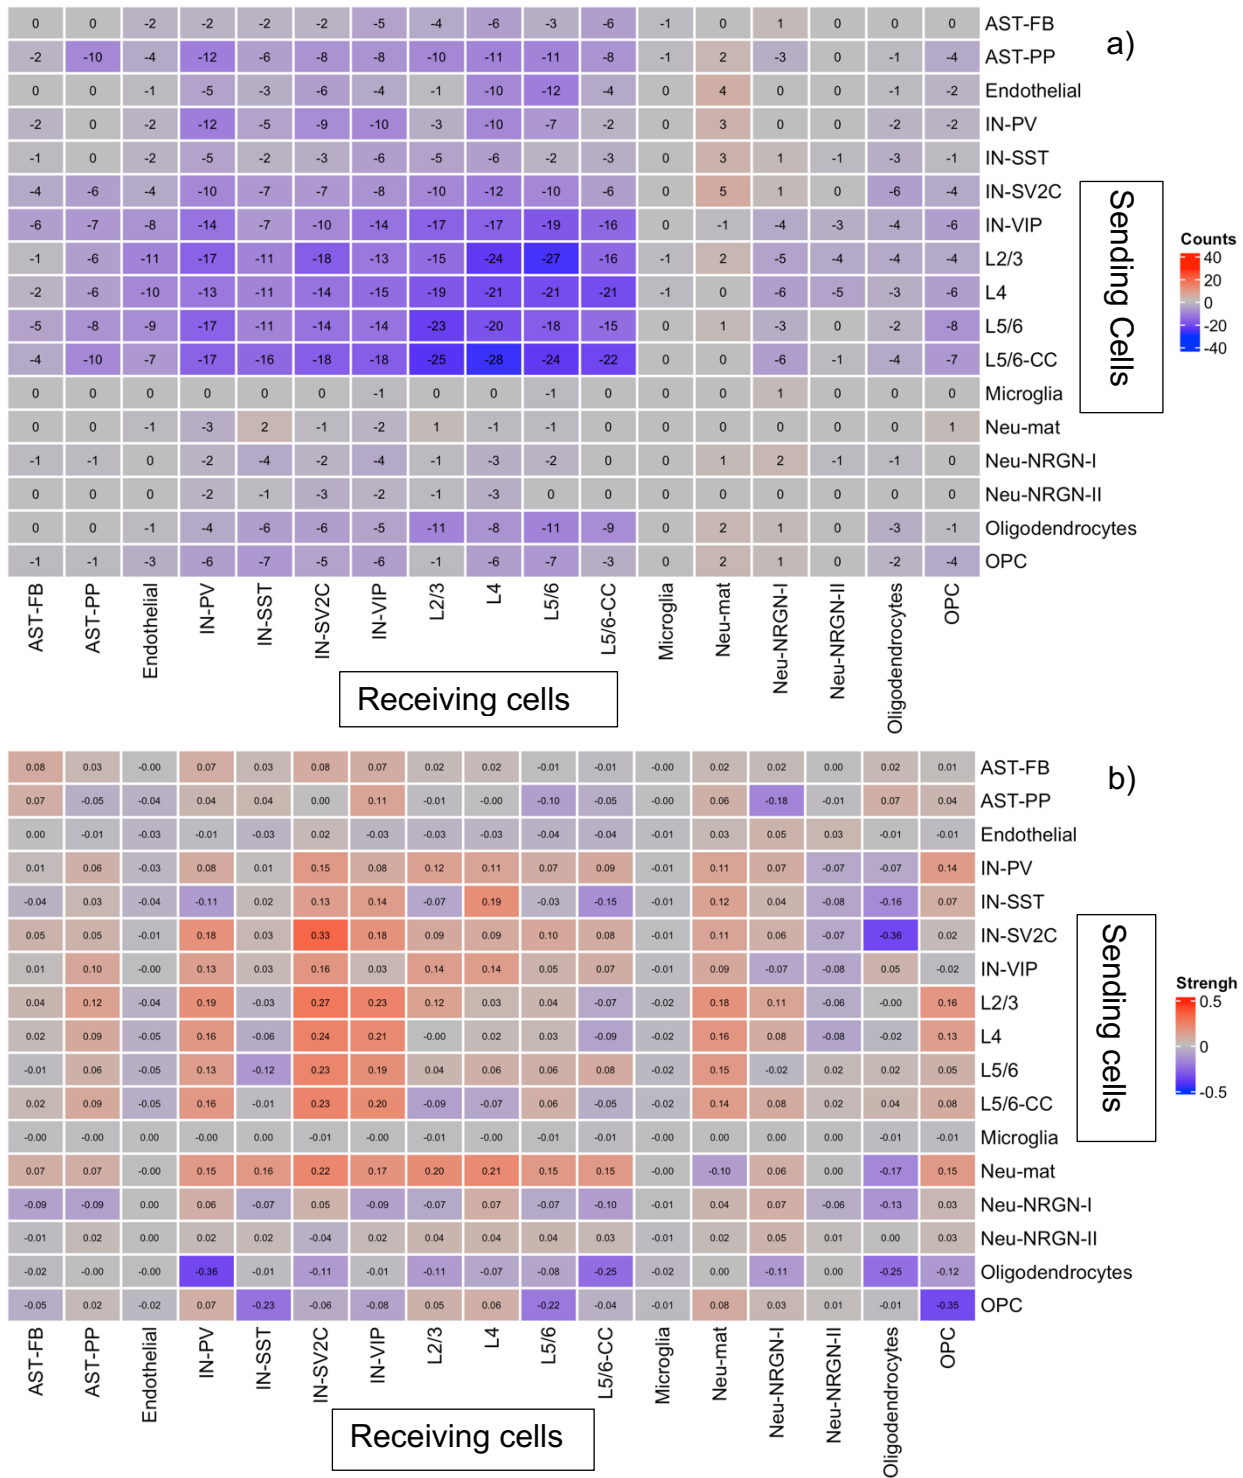

**Figure S2. Heatmaps showing CCC differences between ASD and control PFCs in terms of counts (a) and strengths (b). The rows and columns indicate signaling sending and receiving cells, respectively.**

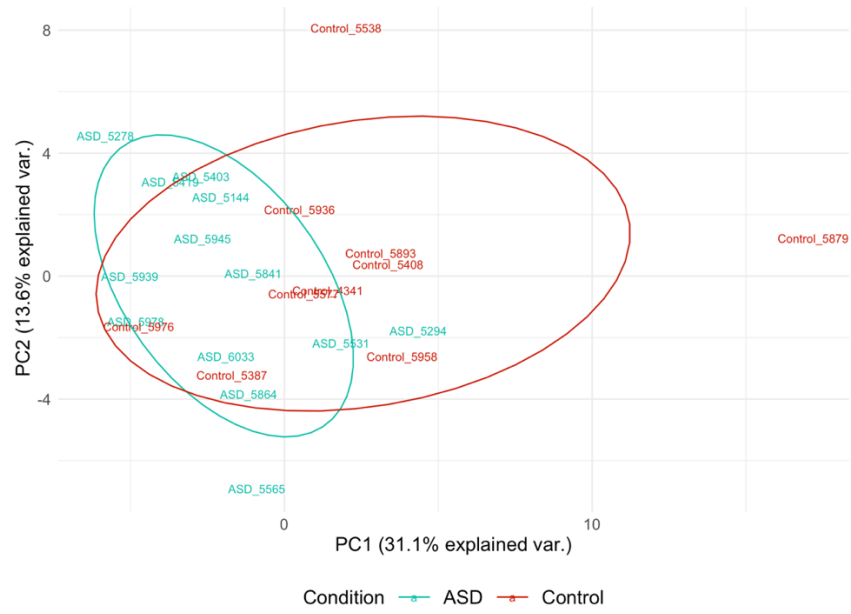

**Figure S3. PCA plot based on pathway interaction strengths in ASD and control samples.**

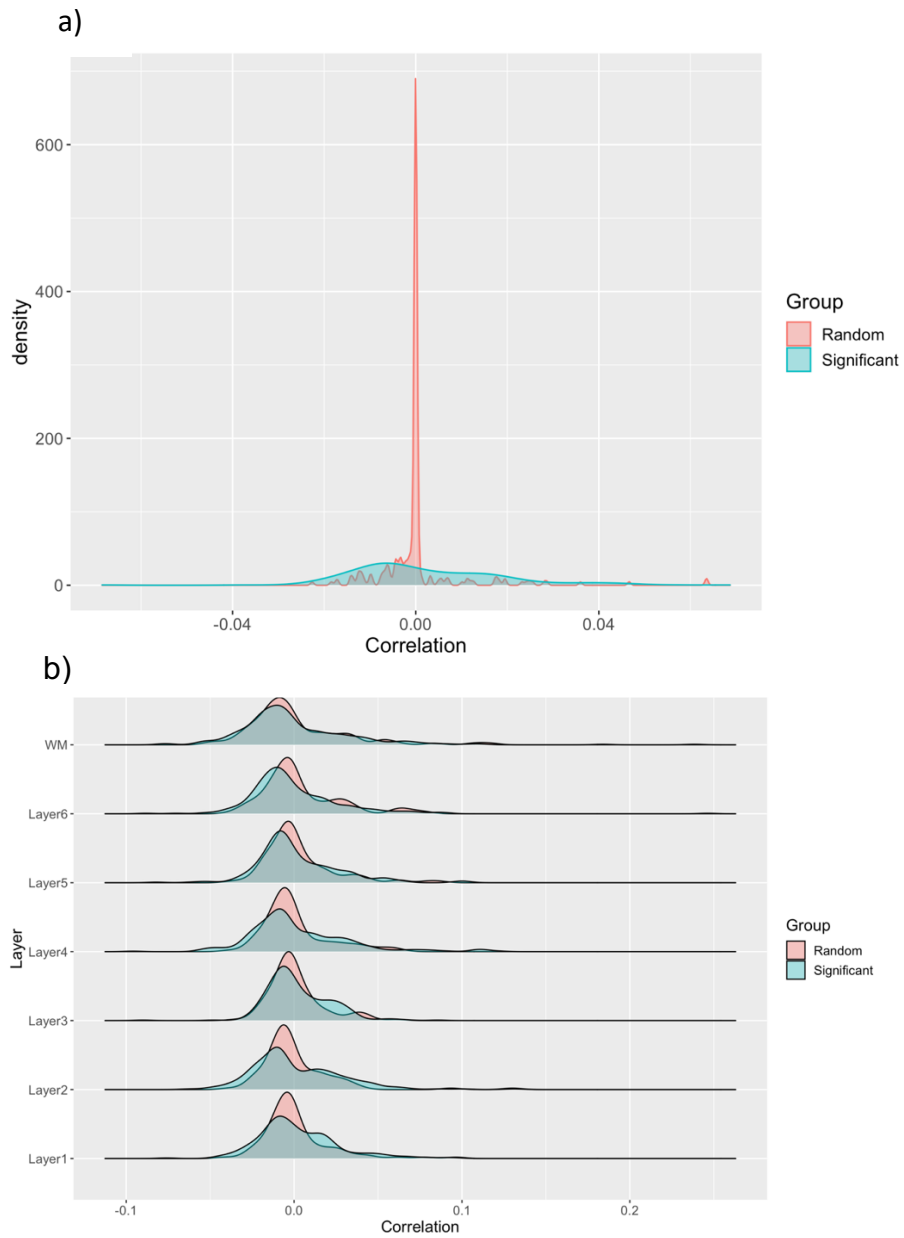

**Figure S4. Density plots for spatial expression correlation of actual L-R pairs identified in the snRNA-seq data or randomly paired L-Rs, using either all spatial spots (a) or only spots in defined brain layers (b).**

a)

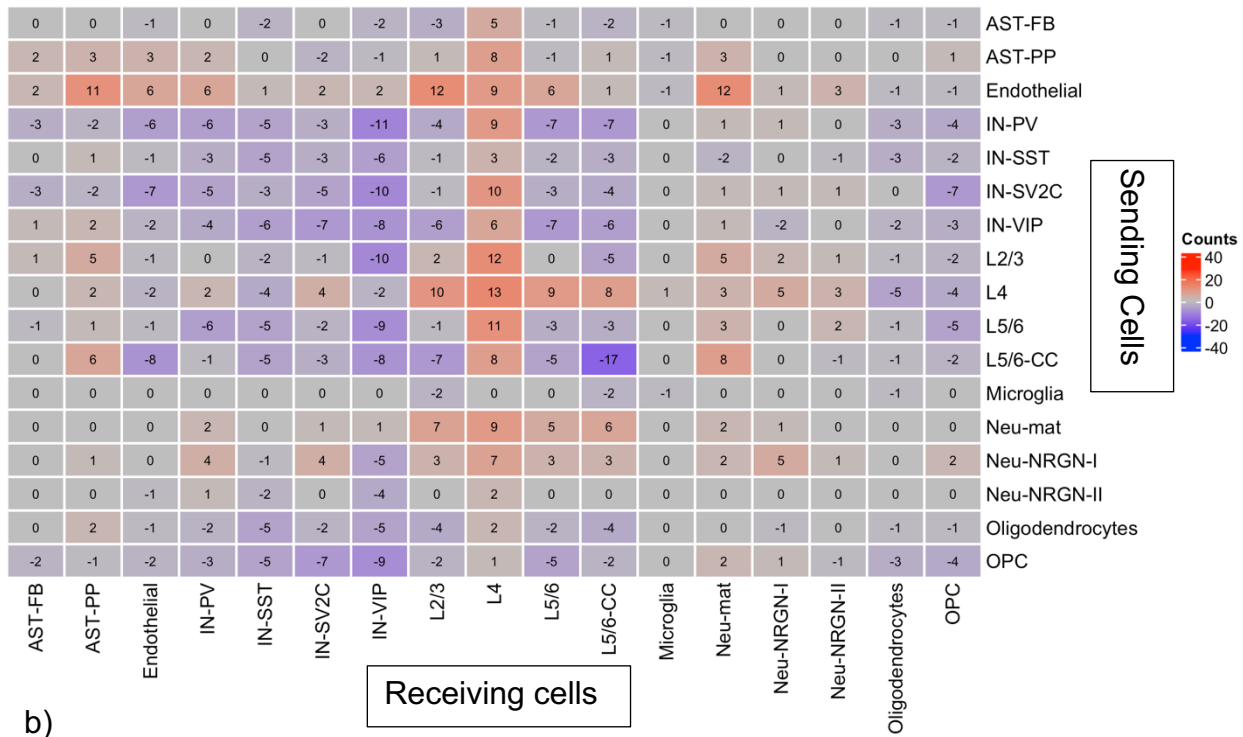

b)

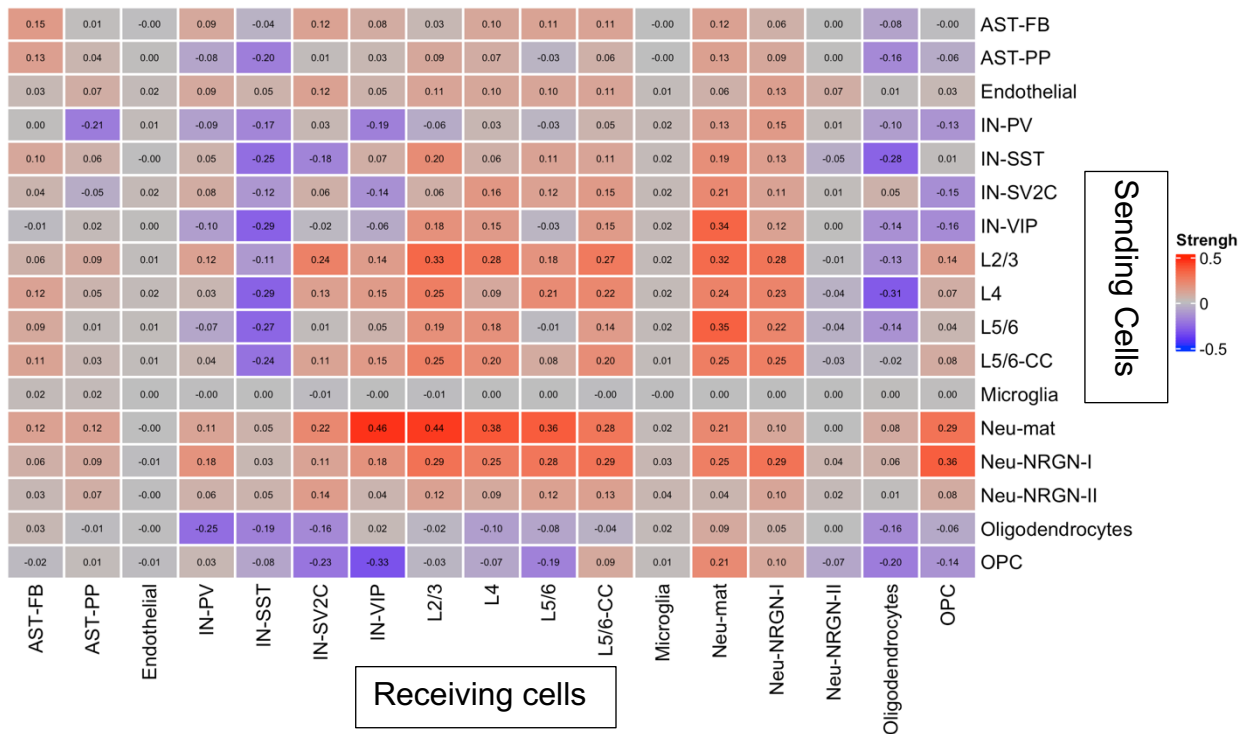

Figure S5. Heatmaps showing CCC differences between ASD and control ACCs in terms of counts (a) and strengths (b).

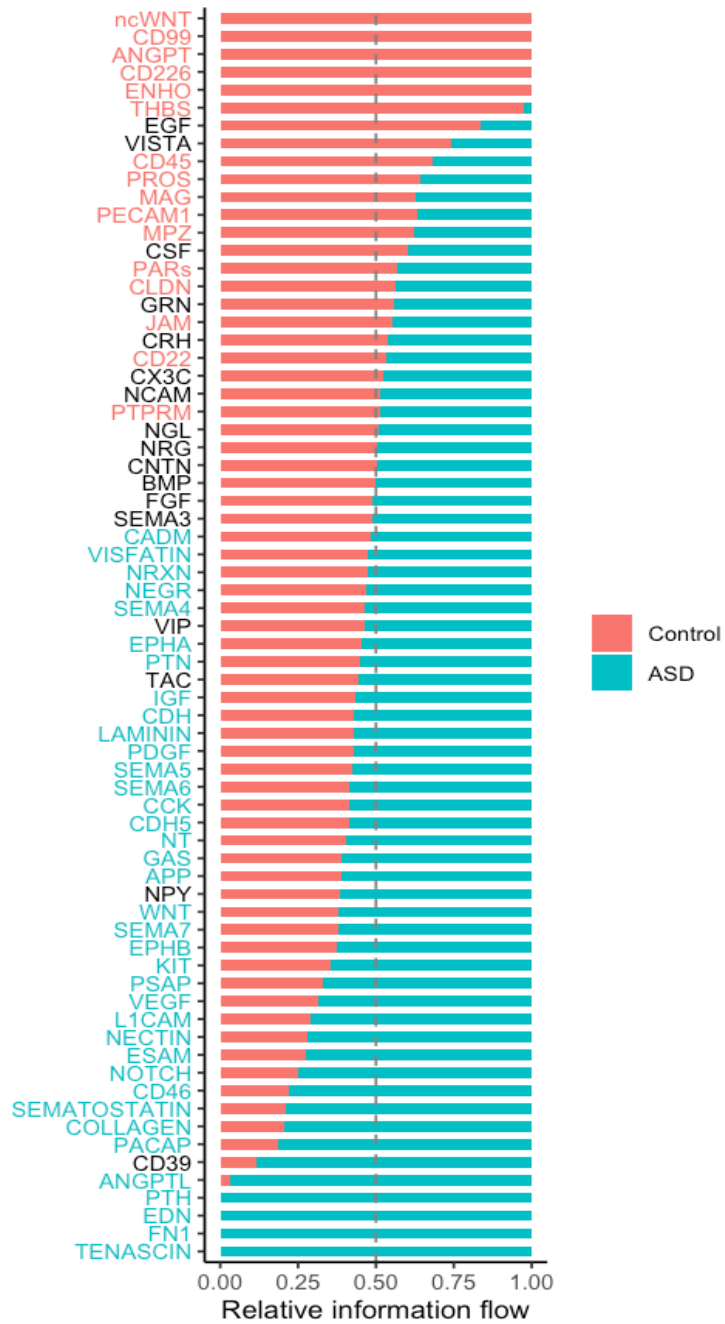

Figure S6. Pan cell-type signaling networks identified in ASD ACC vs controls.

a) Difference in the incoming signaling

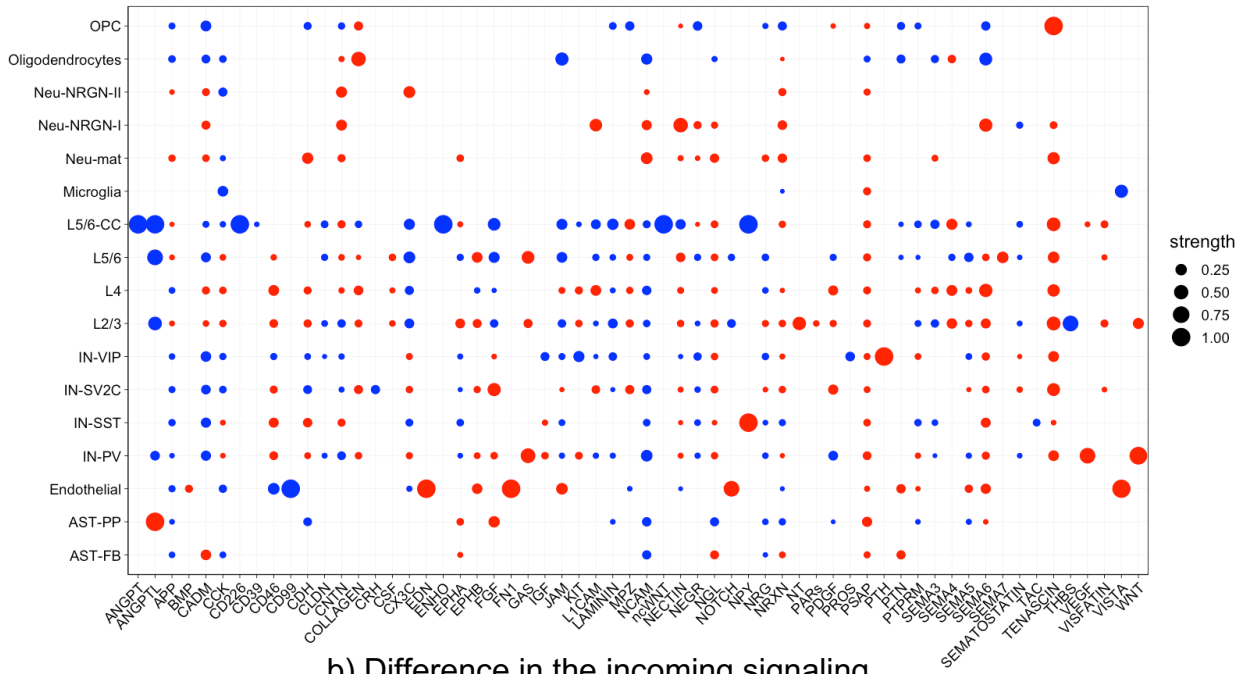

b) Difference in the incoming signaling

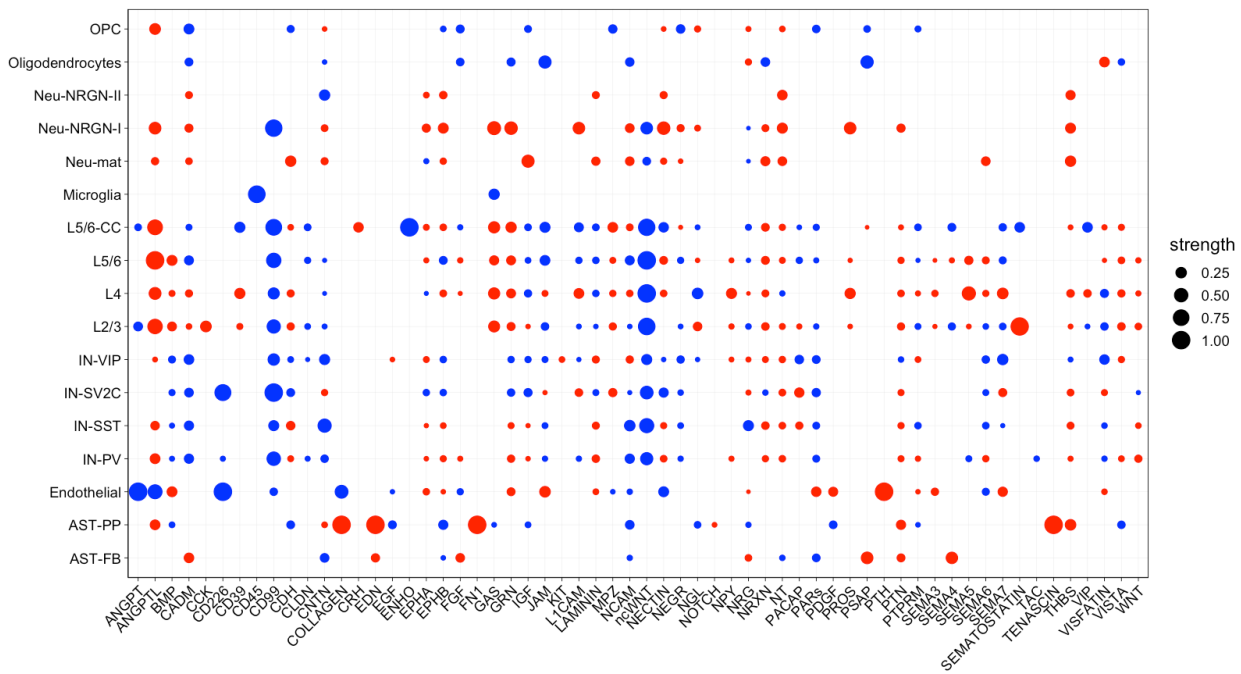

**Figure S7.** Dot plots showing the change in relative contributions of each ACC cell type to outgoing (a) or incoming (b) signaling in ASD vs controls.

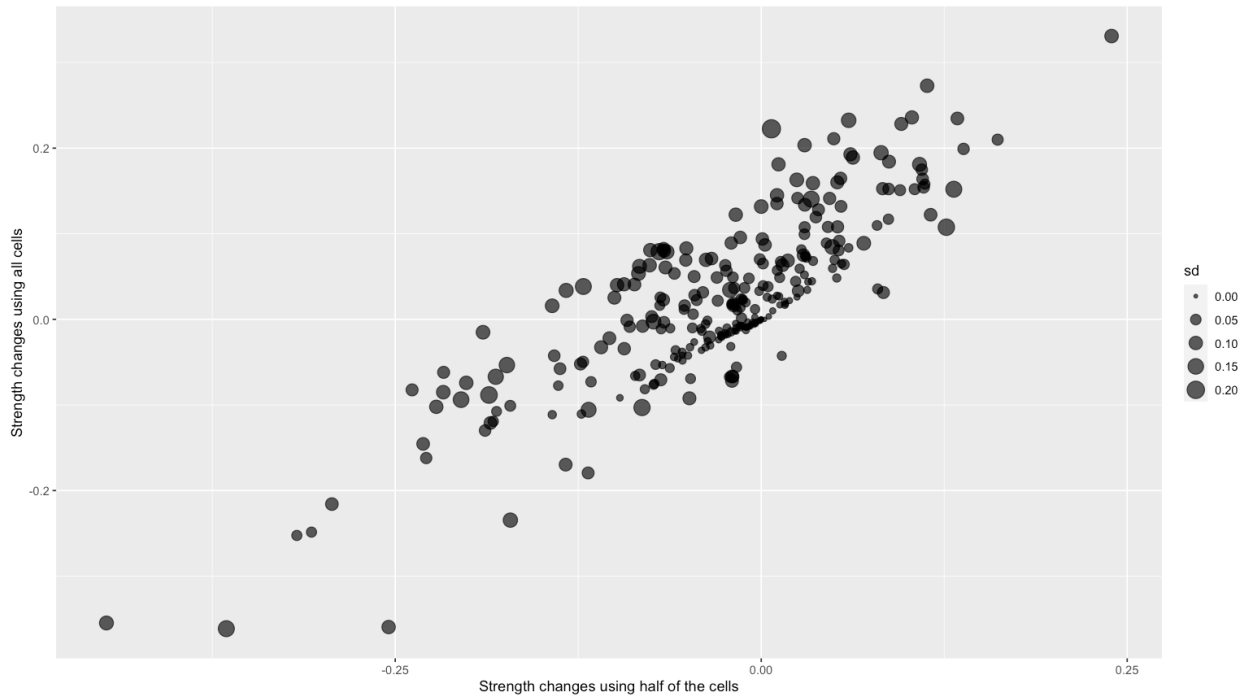

**Figure S8. Bubble plots showing the change in interaction strengths between individual pairs of cell types.** The y-axis shows the differences computed with all cells, while the x-axis shows the differences computed with one half of the cells. In the analysis of one half of the cells, 50% of the cells were randomly selected to run CellChat 10 times, the mean differences are plotted on the x-axis with the standard deviations from the 10 runs indicated by bubble sizes.
